# Supplementary material for: Study of the Adsorption and Separation Behavior of Scandium and Zirconium by Trialkyl Phosphine Oxide-Modified Resins in Sulfuric and Hydrochloric Acid Media
Source: MDPI journal article supplement (doi:10.3390/toxics12050350), 2024-05-10
Supplement: s1 [file s1]

## Supporting Information (SI) for

### **Study of the adsorption and separation behavior of scandium and zirconium by trialkyl phosphine oxide-modified resins in sulfuric and hydrochloric acid media**

Botao Xu <sup>a</sup>, Xiangbiao Yin <sup>\*,b</sup>, Shunyan Ning <sup>b</sup>, Yilai Zhong <sup>a</sup>, Toyohisa Fujita <sup>a</sup>,  
Mohammed F. Hamza <sup>b</sup>, Yuezhou Wei <sup>b, c, \*</sup>

<sup>a</sup> *State Key Laboratory of Featured Metal Materials and Life-cycle Safety for Composite Structures, MOE Key Laboratory of New Processing Technology for Nonferrous Metals and Materials, and School of Resources, Environment and Materials, Guangxi University, Nanning 530004, P.R. China,*

<sup>b</sup> *School of Nuclear Science and Technology, University of South China, 28 Changsheng West Road, Hengyang 421001, P.R. China.*

<sup>c</sup> *School of Nuclear Science and Engineering, Shanghai Jiao Tong University, 800 Dong Chuan Road, Shanghai 200240, China*

*\* Address: School of Nuclear Science and Technology, University of South China, 28 Changsheng West Road, Hengyang 421001, PR China*

*Email: [yinxb@usc.edu.cn](mailto:yinxb@usc.edu.cn)*

*ORCID: 0000-0003-2319-1789*

*\* Address: School of Nuclear Science and Technology, University of South China, 28 Changsheng West Road, Hengyang 421001, PR China*

*Email: [yzwei@usc.edu.cn](mailto:yzwei@usc.edu.cn)*

*ORCID: 0000-0003-3821-9078*

### **Toxics**

**\*To Whom Correspondence Should Be Addressed**

Contents:

5 Pages (Including cover page)

2 tables

3 figures

## 2 Experimental

### 2.1. Materials

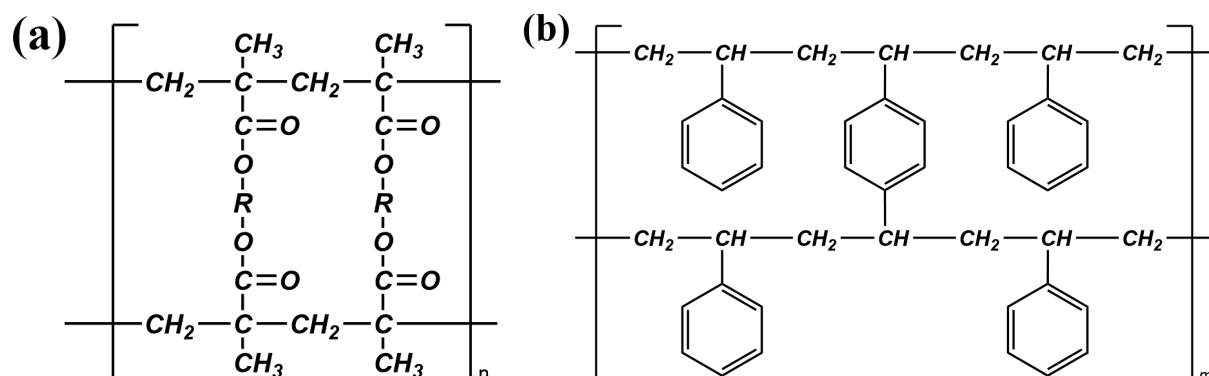

Fig. S1. Chemical structures of (a) XAD7HP and (b) HZ-635 (*R* means Alkyl)

### 2.5. Column separation experiment

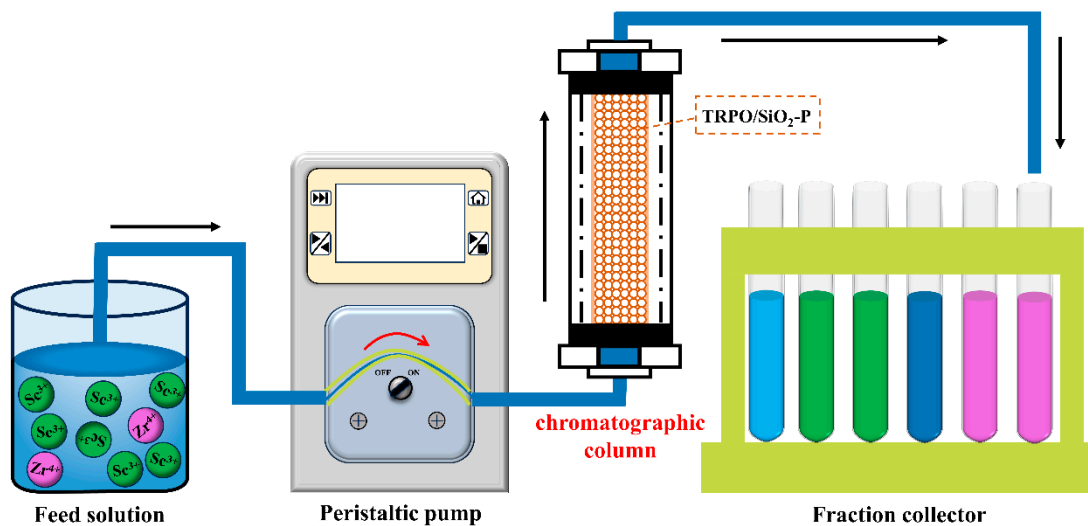

Fig. S2. Simple schematic diagram of the column system

## 3. Results and discussion

### 3.1.1. Effect of carrier and acidity

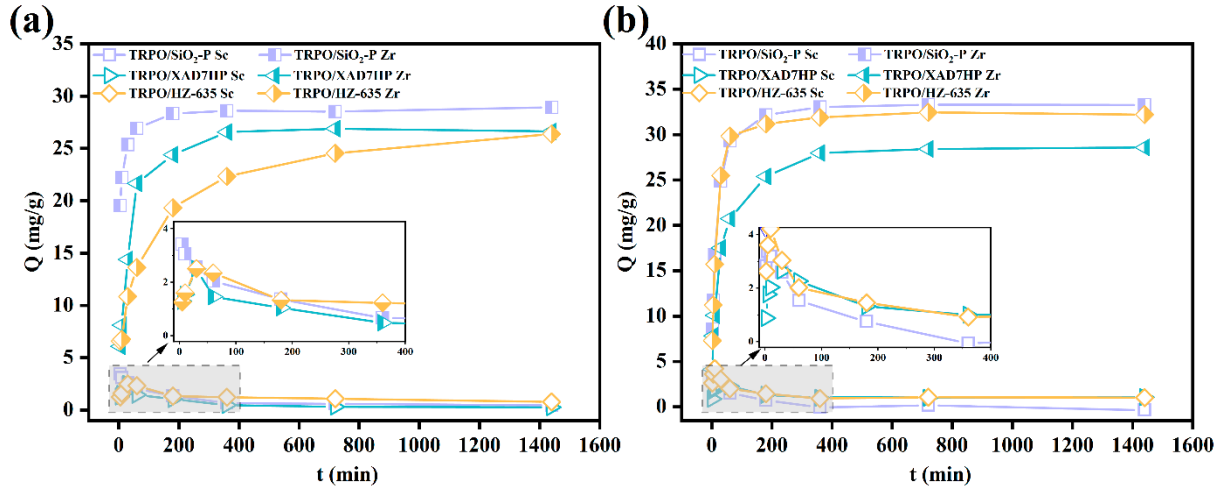

Fig. S3. Effect of contact time on the adsorption performance ( $m/V = 0.1$  g/5 mL, Sc(III)/Zr(IV) = 5 mM/5 mM,  $T = 298$  K, shaking speed : 140 rpm, medium: (a) in 0.2 M  $H_2SO_4$ , (b) in 5 M  $HCl$  solutions)

### 3.1.4. Kinetic analysis

In this work, both pseudo-first-order kinetics model (Eq. S1), pseudo-second-order kinetic model (Eq. S2), and Weber-Morris internal diffusion model (Eq. S3) were applied to analyze the experimental data<sup>[1, 2]</sup>.

$$\ln(Q_e - Q_t) = \ln(Q_e) - k_1 t \quad (S1)$$

$$\frac{t}{Q_t} = \left( \frac{1}{Q_e} \right) t + \frac{1}{k_2 Q_e^2} \quad (S2)$$

$$Q_t = k_p t^{1/2} + C \quad (S3)$$

Where  $Q_e$  ( $mg \cdot g^{-1}$ ) and  $Q_t$  ( $mg \cdot g^{-1}$ ) are the equilibrium adsorption capacity and adsorption capacity at time  $t$  (h) respectively;  $k_1$  ( $h^{-1}$ ),  $k_2$  ( $mg \cdot g^{-1} h^{-1}$ ) and  $k_p$  ( $mg \cdot g^{-1} \cdot h^{-1/2}$ ) are the adsorption rate constant of pseudo-first-order, pseudo-second-order and intra-particle diffusion model respectively.  $C$  is a constant associated with the thickness of the boundary layer.

**Table S1** Internal diffusion model fitting data in 0.2 M  $H_2SO_4$  solution.

| Element | $T$<br>(K) | Step 1                                           |       |         | Step 2   |       |         | Step 3   |       |         |
|---------|------------|--------------------------------------------------|-------|---------|----------|-------|---------|----------|-------|---------|
|         |            | $K_{P1}$<br>( $mg \cdot g^{-1} \cdot h^{-1/2}$ ) | $C_1$ | $R_1^2$ | $K_{P2}$ | $C_2$ | $R_2^2$ | $K_{P3}$ | $C_3$ | $R_3^2$ |
| Sc      | 298        |                                                  |       |         |          |       |         |          |       |         |

|    |     |      |       |      |      |       |      |      |       |      |
|----|-----|------|-------|------|------|-------|------|------|-------|------|
| Zr | 298 | 3.28 | 68.1  | 0.98 | 1.12 | 75.30 | 0.99 | 0.04 | 87.16 | 0.80 |
|    | 308 | 4.09 | 68.2  | 0.99 | 1.07 | 78.13 | 0.99 | 0.05 | 89.02 | 0.96 |
|    | 310 | 5.53 | 67.99 | 0.98 | 0.88 | 82.98 | 1    | 0.05 | 92.09 | 0.92 |

**Table S2** Internal diffusion model fitting data in 5 M HCl solution.

| Element | <i>T</i><br>(K) | Step 1                                                            |       |         | Step 2   |       |         | Step 3   |       |         |
|---------|-----------------|-------------------------------------------------------------------|-------|---------|----------|-------|---------|----------|-------|---------|
|         |                 | $K_{PI}$<br>( $\text{mg}\cdot\text{g}^{-1}\cdot\text{h}^{-1/2}$ ) | $C_I$ | $R_I^2$ | $K_{P2}$ | $C_2$ | $R_2^2$ | $K_{P3}$ | $C_3$ | $R_3^2$ |
| Sc      | 298             |                                                                   |       |         |          |       |         |          |       |         |
| Zr      | 298             | 3.28                                                              | 68.1  | 0.98    | 1.12     | 75.30 | 0.99    | 0.04     | 87.16 | 0.80    |
|         | 308             | 4.09                                                              | 68.2  | 0.99    | 1.07     | 78.13 | 0.99    | 0.05     | 89.02 | 0.96    |
|         | 310             | 5.53                                                              | 67.99 | 0.98    | 0.88     | 82.98 | 1       | 0.05     | 92.09 | 0.92    |

### 3.1.5. Adsorption isothermal

The isothermal adsorption of TRPO/SiO<sub>2</sub>-P was analyzed by Langmuir equation (Eq. S4), Freundlich equation (Eq. S5) and Redlich-Peterson equation (Eq. S6)<sup>[3-6]</sup>.

$$Q_e = \frac{q_m \times K_L \times C_e}{1 + K_L \times C_e} \quad (\text{S4})$$

$$Q_e = K_F \times C_e^{\frac{1}{n}} \quad (\text{S5})$$

$$Q_e = \frac{A \times C_e}{1 + B \times C_e^g} \quad (\text{S6})$$

where  $Q_e$  ( $\text{mg}\cdot\text{g}^{-1}$ ) and  $q_m$  ( $\text{mg}\cdot\text{g}^{-1}$ ) are equilibrium adsorption capacity and calculated saturation adsorption capacity;  $C_e$  ( $\text{mmol}\cdot\text{L}^{-1}$ ) means equilibrium ions concentration;  $K_L$  ( $\text{L}\cdot\text{mg}^{-1}$ ) and  $K_F$  ( $\text{mg}^{1-n}\cdot\text{L}^n/\text{g}$ ) are constants of Langmuir and Freundlich isotherm model;  $n$  means adsorption intensity; where  $A$ ,  $B$ , and  $g$  are the Redliche-Peterson parameters.

## References

- [1] W. Ma, T.T. Lv, J.H. Tang, M.L. Feng, X.Y. Huang, Highly Efficient Uptake of  $\text{Cs}^+$  by Robust Layered Metal-Organic Frameworks with a Distinctive Ion Exchange Mechanism, *JACS Au*, 2 (2022) 492-501.
- [2] S. Zhang, S. Ning, H. Liu, X. Wang, Y. Wei, X. Yin, Preparation of ion-exchange resin via in-situ polymerization for highly selective separation and continuous removal of palladium from electroplating wastewater, *Separation and Purification Technology*, 258 (2021).
- [3] M. Vigdorowitsch, A. Pchelintsev, L. Tsygankova, E. Tanygina, Freundlich Isotherm: An Adsorption Model Complete Framework, *Applied Sciences*, 11 (2021).
- [4] M.A. Al-Ghouti, D.A. Da'ana, Guidelines for the use and interpretation of adsorption isotherm models: A review, *J Hazard Mater*, 393 (2020) 122383.
- [5] K.Y. Foo, B.H. Hameed, Insights into the modeling of adsorption isotherm systems, *Chemical Engineering Journal*, 156 (2010) 2-10.
- [6] R. Han, W. Zou, Y. Wang, L. Zhu, Removal of uranium(VI) from aqueous solutions by manganese oxide coated zeolite: discussion of adsorption isotherms and pH effect, *J Environ Radioact*, 93 (2007) 127-143.
